# Supplementary material
Source: Springer Nature journal article supplement (https://www.springermedizin.de/resource/supplementary/13024_2011_237_MOESM15_ESM.pdf/9643734)

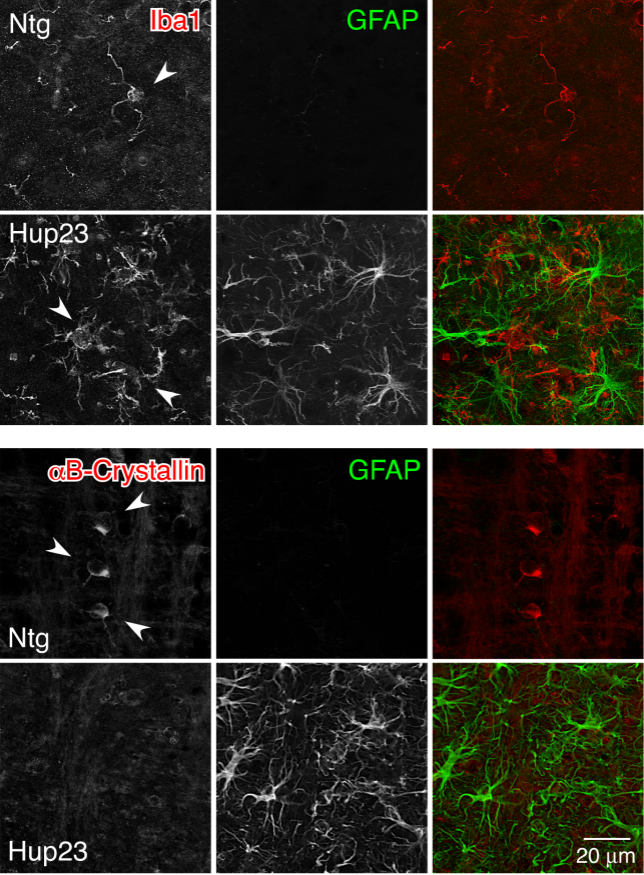

Ntg

Iba1

GFAP

Hup23

$\alpha$ B-Crystallin

GFAP

Ntg

Hup23

20  $\mu$ m

Supplement: MOESM15 [file 9643734]
